# Supplementary material
Source: MDPI journal article supplement (https://www.mdpi.com/2073-445X/10/9/982)
Supplement: s1 [file s1]

Table S1 Descriptive statistics of regression coefficients of independent variables for arable land

| Variables     | Average in<br>1995-2000 | Average in<br>2000-2020 | Average in<br>1995-2020 | Percentage of<br>significant counties |
|---------------|-------------------------|-------------------------|-------------------------|---------------------------------------|
| Intercept     | 1.58                    | 1.85                    | 1.78                    | 85.33%                                |
| Precipitation | -0.57                   | -0.61                   | -0.60                   | 94.00%                                |
| Slope         | 0.03                    | -0.20                   | -0.15                   | 84.67%                                |
| GDP           | -0.59                   | -0.57                   | -0.58                   | 60.00%                                |
| Population    | 2.36                    | 2.25                    | 2.28                    | 92.67%                                |
| Urbanization  | -0.03                   | -0.06                   | -0.05                   | 69.33%                                |

Table S2 Descriptive statistics of regression coefficients of independent variables for woodland

| Variables     | Average in<br>1995-2000 | Average in<br>2000-2020 | Average in<br>1995-2020 | Percentage of significant counties |
|---------------|-------------------------|-------------------------|-------------------------|------------------------------------|
| Intercept     | -4.66                   | -2.72                   | -3.12                   | 78.00%                             |
| Precipitation | 0.18                    | 0.53                    | 0.46                    | 75.33%                             |
| Slope         | 3.45                    | 2.20                    | 2.45                    | 82.67%                             |
| GDP           | -1.38                   | -0.80                   | -0.93                   | 64.00%                             |
| Population    | 3.69                    | 2.05                    | 2.39                    | 80.00%                             |
| Urbanization  | 3.22                    | 2.22                    | 2.43                    | 88.67%                             |

Table S3 Descriptive statistics of regression coefficients of independent variables for grassland

| Variables     | Average in<br>1995-2000 | Average in<br>2000-2020 | Average in<br>1995-2020 | Percentage of significant<br>counties |
|---------------|-------------------------|-------------------------|-------------------------|---------------------------------------|
| Intercept     | 2.24                    | 2.68                    | 2.56                    | 96.00%                                |
| Precipitation | -0.20                   | -0.24                   | -0.23                   | 42.67%                                |
| Slope         | -0.77                   | -1.19                   | -1.09                   | 81.33%                                |
| GDP           | -0.61                   | -0.51                   | -0.53                   | 60.00%                                |
| Population    | 1.65                    | 1.48                    | 1.53                    | 79.33%                                |
| Urbanization  | 1.02                    | 0.92                    | 0.96                    | 88.00%                                |

Table S4 Descriptive statistics of regression coefficients of independent variables for  
construction land

| Variables     | Average in<br>1995-2000 | Average in<br>2000-2020 | Average in<br>1995-2020 | Percentage of significant<br>counties |
|---------------|-------------------------|-------------------------|-------------------------|---------------------------------------|
| Intercept     | -4.06                   | -3.40                   | -3.48                   | 100.00%                               |
| Precipitation | 0.21                    | 1.15                    | 0.98                    | 100.00%                               |
| Slope         | -0.48                   | -1.93                   | -1.69                   | 100.00%                               |
| GDP           | -0.24                   | 0.44                    | 0.34                    | 100.00%                               |
| Population    | 2.30                    | 2.51                    | 2.44                    | 100.00%                               |
| Urbanization  | 1.85                    | 1.26                    | 1.33                    | 100.00%                               |
